# Supplementary material
Source: publisher site journal article supplement (https://www.spandidos-publications.com/6246/downloadSupplementary)
Supplement: Supplementary file 1 [file downloadSupplementary]

## Sheet: Sheet1
Table SII. Effect estimates of the associations between gastric cancer and risk of nine bacterial traits in the reverse MR analyses.
	id.exposure	id.outcome	outcome	exposure	method	nsnp	b	se	1.96se	B-1.96se	B+1.96se	OR	LCI	HCI	pval
1	finn-b-C3_STOMACH	ebi-a-GCST90016936	Gut microbiota abundance (family Enterobacteriaceae id.3469) || id:ebi-a-GCST90016936	|| id:finn-b-C3_STOMACH	MR Egger	5	-0.03403	0.101499	0.198938	-0.232968	0.164908	0.966543	0.792179	1.17928	0.75948
2	finn-b-C3_STOMACH	ebi-a-GCST90016936	Gut microbiota abundance (family Enterobacteriaceae id.3469) || id:ebi-a-GCST90016936	|| id:finn-b-C3_STOMACH	Weighted median	5	-0.04465	0.026342	0.0516303	-0.0962803	0.00698032	0.956332	0.908209	1.007	0.090037
3	finn-b-C3_STOMACH	ebi-a-GCST90016936	Gut microbiota abundance (family Enterobacteriaceae id.3469) || id:ebi-a-GCST90016936	|| id:finn-b-C3_STOMACH	Inverse variance weighted	5	-0.01497	0.021519	0.0421772	-0.0571472	0.0272072	0.985141	0.944455	1.02758	0.486536
4	finn-b-C3_STOMACH	ebi-a-GCST90016936	Gut microbiota abundance (family Enterobacteriaceae id.3469) || id:ebi-a-GCST90016936	|| id:finn-b-C3_STOMACH	Simple mode	5	-0.04777	0.039191	0.0768144	-0.124584	0.0290444	0.953353	0.882864	1.02947	0.289823
5	finn-b-C3_STOMACH	ebi-a-GCST90016936	Gut microbiota abundance (family Enterobacteriaceae id.3469) || id:ebi-a-GCST90016936	|| id:finn-b-C3_STOMACH	Weighted mode	5	-0.04749	0.037255	0.0730198	-0.12051	0.0255298	0.95362	0.886468	1.02586	0.271398
1	finn-b-C3_STOMACH	ebi-a-GCST90016963	Gut microbiota abundance (genus Allisonella id.2174) || id:ebi-a-GCST90016963	|| id:finn-b-C3_STOMACH	MR Egger	4	-0.28544	0.576645	1.13022	-1.41566	0.844784	0.751683	0.242764	2.32748	0.669636
2	finn-b-C3_STOMACH	ebi-a-GCST90016963	Gut microbiota abundance (genus Allisonella id.2174) || id:ebi-a-GCST90016963	|| id:finn-b-C3_STOMACH	Weighted median	4	0.03793	0.057794	0.113276	-0.0753462	0.151206	1.03866	0.927422	1.16324	0.511632
3	finn-b-C3_STOMACH	ebi-a-GCST90016963	Gut microbiota abundance (genus Allisonella id.2174) || id:ebi-a-GCST90016963	|| id:finn-b-C3_STOMACH	Inverse variance weighted	4	0.02863	0.049086	0.0962086	-0.0675786	0.124839	1.02904	0.934654	1.13297	0.559714
4	finn-b-C3_STOMACH	ebi-a-GCST90016963	Gut microbiota abundance (genus Allisonella id.2174) || id:ebi-a-GCST90016963	|| id:finn-b-C3_STOMACH	Simple mode	4	0.106213	0.090522	0.177423	-0.0712101	0.283636	1.11206	0.931266	1.32795	0.32534
5	finn-b-C3_STOMACH	ebi-a-GCST90016963	Gut microbiota abundance (genus Allisonella id.2174) || id:ebi-a-GCST90016963	|| id:finn-b-C3_STOMACH	Weighted mode	4	0.091938	0.084667	0.165947	-0.0740093	0.257885	1.0963	0.928663	1.29419	0.356992
1	finn-b-C3_STOMACH	ebi-a-GCST90017021	Gut microbiota abundance (genus Lachnospiraceae FCS020 group id.11314) || id:ebi-a-GCST90017021	|| id:finn-b-C3_STOMACH	MR Egger	5	0.0767308	0.0934866	0.183234	-0.106503	0.259965	1.07975	0.898972	1.29688	0.471924
2	finn-b-C3_STOMACH	ebi-a-GCST90017021	Gut microbiota abundance (genus Lachnospiraceae FCS020 group id.11314) || id:ebi-a-GCST90017021	|| id:finn-b-C3_STOMACH	Weighted median	5	0.0106601	0.0246006	0.0482172	-0.0375571	0.0588774	1.01072	0.963139	1.06065	0.664777
3	finn-b-C3_STOMACH	ebi-a-GCST90017021	Gut microbiota abundance (genus Lachnospiraceae FCS020 group id.11314) || id:ebi-a-GCST90017021	|| id:finn-b-C3_STOMACH	Inverse variance weighted	5	-0.00402012	0.0223472	0.0438006	-0.0478207	0.0397804	0.995988	0.953305	1.04058	0.857236
4	finn-b-C3_STOMACH	ebi-a-GCST90017021	Gut microbiota abundance (genus Lachnospiraceae FCS020 group id.11314) || id:ebi-a-GCST90017021	|| id:finn-b-C3_STOMACH	Simple mode	5	0.0180125	0.030665	0.0601034	-0.0420908	0.0781159	1.01818	0.958783	1.08125	0.588494
5	finn-b-C3_STOMACH	ebi-a-GCST90017021	Gut microbiota abundance (genus Lachnospiraceae FCS020 group id.11314) || id:ebi-a-GCST90017021	|| id:finn-b-C3_STOMACH	Weighted mode	5	0.019818	0.0281231	0.0551213	-0.0353033	0.0749392	1.02002	0.965313	1.07782	0.519872
1	finn-b-C3_STOMACH	ebi-a-GCST90017044	Gut microbiota abundance (genus Prevotella7 id.11182) || id:ebi-a-GCST90017044	|| id:finn-b-C3_STOMACH	MR Egger	5	-0.111472	0.184729	0.362068	-0.47354	0.250597	0.894517	0.622794	1.28479	0.588791
2	finn-b-C3_STOMACH	ebi-a-GCST90017044	Gut microbiota abundance (genus Prevotella7 id.11182) || id:ebi-a-GCST90017044	|| id:finn-b-C3_STOMACH	Weighted median	5	-0.0620174	0.0514183	0.10078	-0.162797	0.0387625	0.939867	0.849763	1.03952	0.227766
3	finn-b-C3_STOMACH	ebi-a-GCST90017044	Gut microbiota abundance (genus Prevotella7 id.11182) || id:ebi-a-GCST90017044	|| id:finn-b-C3_STOMACH	Inverse variance weighted	5	-0.0436408	0.0407098	0.0797911	-0.123432	0.0361503	0.957298	0.883882	1.03681	0.28372
4	finn-b-C3_STOMACH	ebi-a-GCST90017044	Gut microbiota abundance (genus Prevotella7 id.11182) || id:ebi-a-GCST90017044	|| id:finn-b-C3_STOMACH	Simple mode	5	-0.0757866	0.0790938	0.155024	-0.23081	0.0792373	0.927014	0.79389	1.08246	0.39223
5	finn-b-C3_STOMACH	ebi-a-GCST90017044	Gut microbiota abundance (genus Prevotella7 id.11182) || id:ebi-a-GCST90017044	|| id:finn-b-C3_STOMACH	Weighted mode	5	-0.0921768	0.0733896	0.143844	-0.23602	0.0516667	0.911944	0.789765	1.05302	0.277475
1	finn-b-C3_STOMACH	ebi-a-GCST90017048	Gut microbiota abundance (genus Roseburia id.2012) || id:ebi-a-GCST90017048	|| id:finn-b-C3_STOMACH	MR Egger	5	0.124124	0.0695432	0.136305	-0.0121808	0.260428	1.13216	0.987893	1.29749	0.172277
2	finn-b-C3_STOMACH	ebi-a-GCST90017048	Gut microbiota abundance (genus Roseburia id.2012) || id:ebi-a-GCST90017048	|| id:finn-b-C3_STOMACH	Weighted median	5	0.0460127	0.0220296	0.0431781	0.00283462	0.0891907	1.04709	1.00284	1.09329	0.0367372
3	finn-b-C3_STOMACH	ebi-a-GCST90017048	Gut microbiota abundance (genus Roseburia id.2012) || id:ebi-a-GCST90017048	|| id:finn-b-C3_STOMACH	Inverse variance weighted	5	0.0296735	0.0180945	0.0354653	-0.00579181	0.0651388	1.03012	0.994225	1.06731	0.101023
4	finn-b-C3_STOMACH	ebi-a-GCST90017048	Gut microbiota abundance (genus Roseburia id.2012) || id:ebi-a-GCST90017048	|| id:finn-b-C3_STOMACH	Simple mode	5	0.0525555	0.0332055	0.0650829	-0.0125274	0.117638	1.05396	0.987551	1.12484	0.188649
5	finn-b-C3_STOMACH	ebi-a-GCST90017048	Gut microbiota abundance (genus Roseburia id.2012) || id:ebi-a-GCST90017048	|| id:finn-b-C3_STOMACH	Weighted mode	5	0.052149	0.0302044	0.0592005	-0.00705158	0.111349	1.05353	0.992973	1.11779	0.159327
1	finn-b-C3_STOMACH	ebi-a-GCST90017055	Gut microbiota abundance (genus Ruminococcaceae UCG004 id.11362) || id:ebi-a-GCST90017055	|| id:finn-b-C3_STOMACH	MR Egger	5	-0.108686	0.0926832	0.181659	-0.290345	0.0729728	0.897012	0.748005	1.0757	0.325573
2	finn-b-C3_STOMACH	ebi-a-GCST90017055	Gut microbiota abundance (genus Ruminococcaceae UCG004 id.11362) || id:ebi-a-GCST90017055	|| id:finn-b-C3_STOMACH	Weighted median	5	-0.0235423	0.028401	0.055666	-0.0792083	0.0321236	0.976733	0.923847	1.03265	0.407146
3	finn-b-C3_STOMACH	ebi-a-GCST90017055	Gut microbiota abundance (genus Ruminococcaceae UCG004 id.11362) || id:ebi-a-GCST90017055	|| id:finn-b-C3_STOMACH	Inverse variance weighted	5	-0.0335906	0.0228897	0.0448639	-0.0784545	0.0112732	0.966967	0.924544	1.01134	0.14224
4	finn-b-C3_STOMACH	ebi-a-GCST90017055	Gut microbiota abundance (genus Ruminococcaceae UCG004 id.11362) || id:ebi-a-GCST90017055	|| id:finn-b-C3_STOMACH	Simple mode	5	-0.0277969	0.0402166	0.0788245	-0.106621	0.0510276	0.972586	0.898866	1.05235	0.527473
5	finn-b-C3_STOMACH	ebi-a-GCST90017055	Gut microbiota abundance (genus Ruminococcaceae UCG004 id.11362) || id:ebi-a-GCST90017055	|| id:finn-b-C3_STOMACH	Weighted mode	5	-0.0302115	0.0384825	0.0754258	-0.105637	0.0452143	0.97024	0.899751	1.04625	0.476304
1	finn-b-C3_STOMACH	ebi-a-GCST90017057	Gut microbiota abundance (genus Ruminococcaceae UCG009 id.11366) || id:ebi-a-GCST90017057	|| id:finn-b-C3_STOMACH	MR Egger	5	-0.0721976	0.142649	0.279592	-0.35179	0.207395	0.930347	0.703428	1.23047	0.647622
2	finn-b-C3_STOMACH	ebi-a-GCST90017057	Gut microbiota abundance (genus Ruminococcaceae UCG009 id.11366) || id:ebi-a-GCST90017057	|| id:finn-b-C3_STOMACH	Weighted median	5	0.00342827	0.0347169	0.0680452	-0.0646169	0.0714734	1.00343	0.937427	1.07409	0.921337
3	finn-b-C3_STOMACH	ebi-a-GCST90017057	Gut microbiota abundance (genus Ruminococcaceae UCG009 id.11366) || id:ebi-a-GCST90017057	|| id:finn-b-C3_STOMACH	Inverse variance weighted	5	0.00739179	0.0319559	0.0626336	-0.0552418	0.0700254	1.00742	0.946256	1.07254	0.817072
4	finn-b-C3_STOMACH	ebi-a-GCST90017057	Gut microbiota abundance (genus Ruminococcaceae UCG009 id.11366) || id:ebi-a-GCST90017057	|| id:finn-b-C3_STOMACH	Simple mode	5	0.0633125	0.060983	0.119527	-0.0562141	0.182839	1.06536	0.945337	1.20062	0.357812
5	finn-b-C3_STOMACH	ebi-a-GCST90017057	Gut microbiota abundance (genus Ruminococcaceae UCG009 id.11366) || id:ebi-a-GCST90017057	|| id:finn-b-C3_STOMACH	Weighted mode	5	-0.0457545	0.0571158	0.111947	-0.157701	0.0661925	0.955276	0.854105	1.06843	0.467967
1	finn-b-C3_STOMACH	ebi-a-GCST90017061	Gut microbiota abundance (genus Ruminococcaceae UCG014 id.11371) || id:ebi-a-GCST90017061	|| id:finn-b-C3_STOMACH	MR Egger	5	-0.0999609	0.0976386	0.191372	-0.291333	0.0914108	0.904873	0.747267	1.09572	0.381284
2	finn-b-C3_STOMACH	ebi-a-GCST90017061	Gut microbiota abundance (genus Ruminococcaceae UCG014 id.11371) || id:ebi-a-GCST90017061	|| id:finn-b-C3_STOMACH	Weighted median	5	-0.0185519	0.0251431	0.0492806	-0.0678325	0.0307287	0.981619	0.934417	1.03121	0.460605
3	finn-b-C3_STOMACH	ebi-a-GCST90017061	Gut microbiota abundance (genus Ruminococcaceae UCG014 id.11371) || id:ebi-a-GCST90017061	|| id:finn-b-C3_STOMACH	Inverse variance weighted	5	0.01289	0.0252365	0.0494636	-0.0365736	0.0623536	1.01297	0.964087	1.06434	0.609514
4	finn-b-C3_STOMACH	ebi-a-GCST90017061	Gut microbiota abundance (genus Ruminococcaceae UCG014 id.11371) || id:ebi-a-GCST90017061	|| id:finn-b-C3_STOMACH	Simple mode	5	-0.0217747	0.0341176	0.0668705	-0.0886452	0.0450959	0.978461	0.91517	1.04613	0.558036
5	finn-b-C3_STOMACH	ebi-a-GCST90017061	Gut microbiota abundance (genus Ruminococcaceae UCG014 id.11371) || id:ebi-a-GCST90017061	|| id:finn-b-C3_STOMACH	Weighted mode	5	-0.0221733	0.0305594	0.0598963	-0.0820696	0.037723	0.978071	0.921208	1.03844	0.508272
1	finn-b-C3_STOMACH	ebi-a-GCST90017098	Gut microbiota abundance (order Enterobacteriales id.3468) || id:ebi-a-GCST90017098	|| id:finn-b-C3_STOMACH	MR Egger	5	-0.0340321	0.101499	0.198937	-0.232969	0.164905	0.966541	0.792178	1.17928	0.75948
2	finn-b-C3_STOMACH	ebi-a-GCST90017098	Gut microbiota abundance (order Enterobacteriales id.3468) || id:ebi-a-GCST90017098	|| id:finn-b-C3_STOMACH	Weighted median	5	-0.0446547	0.026284	0.0515167	-0.0961715	0.00686199	0.956328	0.908308	1.00689	0.0893324
3	finn-b-C3_STOMACH	ebi-a-GCST90017098	Gut microbiota abundance (order Enterobacteriales id.3468) || id:ebi-a-GCST90017098	|| id:finn-b-C3_STOMACH	Inverse variance weighted	5	-0.0149737	0.0215192	0.0421776	-0.0571512	0.0272039	0.985138	0.944451	1.02758	0.486536
4	finn-b-C3_STOMACH	ebi-a-GCST90017098	Gut microbiota abundance (order Enterobacteriales id.3468) || id:ebi-a-GCST90017098	|| id:finn-b-C3_STOMACH	Simple mode	5	-0.0477722	0.0396818	0.0777763	-0.125548	0.0300041	0.953351	0.882013	1.03046	0.295004
5	finn-b-C3_STOMACH	ebi-a-GCST90017098	Gut microbiota abundance (order Enterobacteriales id.3468) || id:ebi-a-GCST90017098	|| id:finn-b-C3_STOMACH	Weighted mode	5	-0.0474928	0.0378744	0.0742338	-0.121727	0.026741	0.953617	0.88539	1.0271	0.278142
